# Supplementary material
Source: PubMed Central journal article supplement (PMC556235)
Supplement: pnas_102_15_5432__1.pdf [file pnas_102_15_5432__1.pdf]

**Table 2. Sampling and molecular diversity indices at the population level**

| Population                    | Location                       | Country     | Coord               | N   | N <sub>hap</sub> | H <sub>e</sub>  | Site-coded indels (333 bp)* |                                     | Block-coded indels (316 bp)* |                        |
|-------------------------------|--------------------------------|-------------|---------------------|-----|------------------|-----------------|-----------------------------|-------------------------------------|------------------------------|------------------------|
|                               |                                |             |                     |     |                  |                 | S                           | $\pi \times 10^2$ (SD) <sup>2</sup> | S                            | $\pi \times 10^2$ (SD) |
| <b>ASIA</b>                   |                                |             |                     |     |                  |                 |                             |                                     |                              |                        |
| Dolsando <sup>1</sup>         | Jeonnam Province               | Korea       | 34°37'N<br>127°43'E | 24  | 3                | 0.45            | 2                           | 0.14<br>(0.14)                      | 2                            | 0.15<br>(0.15)         |
| Maidao Island <sup>2</sup>    | Shangdong                      | China       | 36°3'N<br>120°25'E  | 24  | 1                | 0.00            | 0                           | 0.00<br>(0.00)                      | 0                            | 0.00<br>(0.00)         |
| Ooita <sup>3</sup>            | E. Kyushu Island               | Japan       | 32°56'N<br>131°57'E | 23  | 1                | 0.00            | 0                           | 0.00<br>(0.00)                      | 0                            | 0.00<br>(0.00)         |
| Nagasaki <sup>3</sup>         | W. Kyushu Island               | Japan       | 32°44'N<br>129°52'E | 23  | 2                | 0.30            | 1                           | 0.09<br>(0.11)                      | 1                            | 0.10<br>(0.12)         |
| Shimoda <sup>3</sup>          | S. Honshu Island               | Japan       | 34°40'N<br>138°56'E | 24  | 2                | 0.08            | 19                          | 0.48<br>(0.33)                      | 2                            | 0.03<br>(0.06)         |
| Total                         |                                |             |                     | 118 | 8                | 0.84<br>(±0.01) | 28                          | 1.23<br>(0.68)                      | 11                           | 1.21<br>(0.68)         |
| <b>EUROPE</b>                 |                                |             |                     |     |                  |                 |                             |                                     |                              |                        |
| Kats Marina <sup>4</sup>      | Zelande<br>(Oosterschelde)     | Netherlands | 51°33'N<br>3°57'E   | 23  | 2                | 0.24            | 1                           | 0.08<br>(0.10)                      | 1                            | 0.08<br>(0.10)         |
| Zeebrugge Harbor <sup>5</sup> | W. Flanders                    | Belgium     | 51°19'N<br>1°51'E   | 23  | 5                | 0.45            | 3                           | 0.20<br>(0.18)                      | 3                            | 0.20<br>(0.18)         |
| Calais Marina <sup>5</sup>    | Dover Strait                   | France      | 50°57'N<br>1°51'E   | 23  | 2                | 0.44            | 1                           | 0.14<br>(0.15)                      | 1                            | 0.14<br>(0.15)         |
| Hamble Marina <sup>6</sup>    | Hampshire                      | UK          | 50°51'N<br>1°19'W   | 23  | 4                | 0.66            | 3                           | 0.25<br>(0.21)                      | 3                            | 0.25<br>(0.21)         |
| Saint Malo <sup>7</sup>       | E. Brittany                    | France      | 48°38'N<br>2°00'W   | 24  | 4                | 0.65            | 2                           | 0.26<br>(0.22)                      | 2                            | 0.26<br>(0.22)         |
| Brest Marina <sup>8</sup>     | W. Brittany                    | France      | 48°23'N<br>4°28'W   | 21  | 5                | 0.49            | 3                           | 0.19<br>(0.18)                      | 3                            | 0.19<br>(0.18)         |
| Cudillero Harbor <sup>9</sup> | Asturia                        | Spain       | 43°32'N<br>6°06'W   | 23  | 2                | 0.09            | 1                           | 0.03<br>(0.06)                      | 1                            | 0.03<br>(0.06)         |
| Cabo Cee <sup>10</sup>        | Galicia                        | Spain       | 42°57'N<br>9°10'W   | 24  | 2                | 0.23            | 1                           | 0.07<br>(0.10)                      | 1                            | 0.07<br>(0.10)         |
| Thau Lagoon <sup>11</sup>     | Mediterranean Sea              | France      | 43°24'N<br>3°35'E   | 24  | 1                | 0.00            | 0                           | 0.00<br>(0.00)                      | 0                            | 0.00<br>(0.00)         |
| Total                         |                                |             |                     | 208 | 9                | 0.55<br>(±0.03) | 4                           | 0.21<br>(0.18)                      | 4                            | 0.21<br>(0.18)         |
| <b>AUSTRALASIA</b>            |                                |             |                     |     |                  |                 |                             |                                     |                              |                        |
| Melbourne <sup>12</sup>       | Victoria                       | Australia   | 37°48'S<br>144°57'E | 24  | 2                | 0.39            | 1                           | 0.12<br>(0.13)                      | 1                            | 0.12<br>(0.13)         |
| Tinderbox <sup>13</sup>       | SE Tasmania                    | Australia   | 43°02'S<br>147°18'E | 24  | 1                | 0.00            | 0                           | 0.00<br>(0.00)                      | 0                            | 0.00<br>(0.00)         |
| Bicheno <sup>13</sup>         | Central E. Tasmania            | Australia   | 41°52'S<br>148°17'E | 24  | 2                | 0.39            | 6                           | 0.12<br>(0.13)                      | 1                            | 0.13<br>(0.14)         |
| Diamond Harbor <sup>14</sup>  | Canterbury,<br>South Island    | New Zealand | 43°35'S<br>172°43'E | 24  | 4                | 0.65            | 22                          | 2.69<br>(1.43)                      | 5                            | 0.73<br>(0.46)         |
| Otago Harbor <sup>15</sup>    | Coastal Otago,<br>South Island | New Zealand | 45°53'S<br>170°28'E | 24  | 10               | 0.88            | 24                          | 3.54<br>(1.85)                      | 7                            | 0.99<br>(0.60)         |
| Total                         |                                |             |                     | 120 | 14               | 0.81 (±0.02)    | 31                          | 2.77<br>(1.42)                      | 14                           | 1.66<br>(0.90)         |

| <b>SOUTH AMERICA</b>        |                 |           |                   |    |   |             |    |                |   |                |
|-----------------------------|-----------------|-----------|-------------------|----|---|-------------|----|----------------|---|----------------|
| Golfo Nuevo <sup>16</sup>   | Chubut          | Argentina | 42°46S<br>65°02'W | 24 | 2 | 0.29        | 1  | 0.09<br>(0.11) | 1 | 0.09<br>(0.11) |
| <b>NORTH AMERICA</b>        |                 |           |                   |    |   |             |    |                |   |                |
| Santa Barbara <sup>17</sup> | California      | USA       | 34°25N<br>119°42W | 23 | 1 | 0.00        | 0  | 0.00<br>(0.00) | 0 | 0.00<br>(0.00) |
| <b>CROPS</b>                |                 |           |                   |    |   |             |    |                |   |                |
| Korea crop                  | N/A             | Korea     | NA                | 3  | 2 | 0.67        | 1  | 0.21<br>(0.27) | 1 | 0.21<br>(0.27) |
| Japan crop                  | N/A             | Japan     | NA                | 4  | 3 | 0.83        | 22 | 3.36<br>(2.32) | 5 | 0.85<br>(0.67) |
| France crop <sup>18</sup>   | English Channel | France    | 48°34'N<br>1°58'W | 24 | 1 | 0.00        | 0  | 0.00<br>(0.00) | 0 | 0.00<br>(0.00) |
| Total                       |                 |           |                   | 31 | 4 | 0.24 (±0.1) | 23 | 1.20<br>(0.69) | 6 | 0.29<br>(0.23) |

Coord., geographical coordinates; N<sub>ind</sub>, number of individuals analysed; N<sub>hap</sub>, number of haplotypes; H<sub>e</sub>, haplotypic diversity; S, number of polymorphic sites;  $\pi$ , nucleotide diversity.

\*S,  $\pi$  calculated with the two multiple site indels (respective length=16 and 2 bp) counting as 18 independent sites (total sequence length=333 bp) or grouped into two unique sites (total sequence length=316 bp).

Collected by: <sup>1</sup>S. M. Boo, G.Y. Cho, Chungnam National University, Korea; <sup>2</sup>T. Xian, Institute of Oceanology, Chinese Academy of Sciences (Qingdao), China, <sup>3</sup>S. Uwai, Kobe University, Japan, <sup>4</sup>C. Engel, D. Gautier, Station Biologique de Roscoff (SBR), France, <sup>5</sup>F. Kerckhof, Royal Belgian Institute of Natural Sciences, Belgium, <sup>6</sup>C. Maggs, Queen's University at Belfast, GB, <sup>7</sup>C. Engel, F. Viard, SBR, France, <sup>8</sup>Co. Destombe, C. Engel, M. Valero, SBR, France, <sup>9</sup>J. Rico, University of Oveido, Spain, <sup>10</sup>J. Cremades, O. Freire, University of Corona, Spain; <sup>11</sup>A. Rohrfristch, University of Montpellier, France, <sup>12</sup>M. Edmunds, Australian Marine Ecology, Australia, <sup>13</sup>C. Sanderson, University of Tasmania, Australia, <sup>14</sup>B. Forrest, Cawthron Institute, New Zealand, <sup>15</sup>C. Hurd, University of Otago, New Zealand, <sup>16</sup>G. Casas, CONICET, Argentina, <sup>17</sup>B. Kinlan, University of California at Santa Barbara, USA, <sup>18</sup>J.F. Arbona, M. Molla, C-Weed Aquaculture, France
