# Supplementary material
Source: PubMed Central journal article supplement (PMC556235)
Supplement: pnas_102_15_5432__2.pdf [file pnas_102_15_5432__2.pdf]

**Table 3. Concatenated haplotype definition and accession numbers**

| <b>Concatenated haplotype</b> | <b>atp8-S haplotype</b> | <b>GenBank Accession no.</b> | <b>W-I haplotype</b> | <b>GenBank Accession no.</b> |
|-------------------------------|-------------------------|------------------------------|----------------------|------------------------------|
| Up1                           | ATP8-S2                 | AY821890                     | W-I1                 | AY821898                     |
| Up2                           | ATP8-S1                 | AY821889                     | W-I4                 | AY821901                     |
| Up3                           | ATP8-S2                 | AY821890                     | W-I4                 | AY821901                     |
| Up4                           | ATP8-S1                 | AY821889                     | W-I1                 | AY821898                     |
| Up5                           | ATP8-S2                 | AY821890                     | W-I3                 | AY821900                     |
| Up6                           | ATP8-S2                 | AY821890                     | W-I2                 | AY821899                     |
| Up7                           | ATP8-S3                 | AY821891                     | W-I1                 | AY821898                     |
| Up8                           | ATP8-S3                 | AY821891                     | W-I2                 | AY821899                     |
| Up9                           | ATP8-S3                 | AY821891                     | W-I4                 | AY821901                     |
| Up10                          | ATP8-S4                 | AY821892                     | W-I1                 | AY821898                     |
| Up11                          | ATP8-S1                 | AY821889                     | W-I9                 | AY821906                     |
| Up12                          | ATP8-S2                 | AY821890                     | W-I7                 | AY821904                     |
| Up13                          | ATP8-S2                 | AY821890                     | W-I9                 | AY821906                     |
| Up14                          | ATP8-S1                 | AY821889                     | W-I7                 | AY821904                     |
| Up15                          | ATP8-S1                 | AY821889                     | W-I6                 | AY821903                     |
| Up16                          | ATP8-S2                 | AY821890                     | W-I6                 | AY821903                     |
| Up17                          | ATP8-S3                 | AY821891                     | W-I7                 | AY821904                     |
| Up18                          | ATP8-S4                 | AY821892                     | W-I7                 | AY821904                     |
| Up19                          | ATP8-S2                 | AY821890                     | W-I5                 | AY821902                     |
| Up20                          | ATP8-S5                 | AY821893                     | W-I5                 | AY821902                     |
| Up21                          | ATP8-S6                 | AY821894                     | W-I5                 | AY821902                     |
| Up22                          | ATP8-S7                 | AY821895                     | W-I5                 | AY821902                     |
| Up23                          | ATP8-S8                 | AY821896                     | W-I5                 | AY821902                     |
| Up24                          | ATP8-S9                 | AY821897                     | W-I5                 | AY821902                     |
| Up25                          | ATP8-S9                 | AY821897                     | W-I8                 | AY821905                     |
